# Supplementary material
Source: publisher figshare collection journal article supplement (https://springernature.figshare.com/ndownloader/files/22113390)

## Survival Comparison, by Cohort vs General Pop

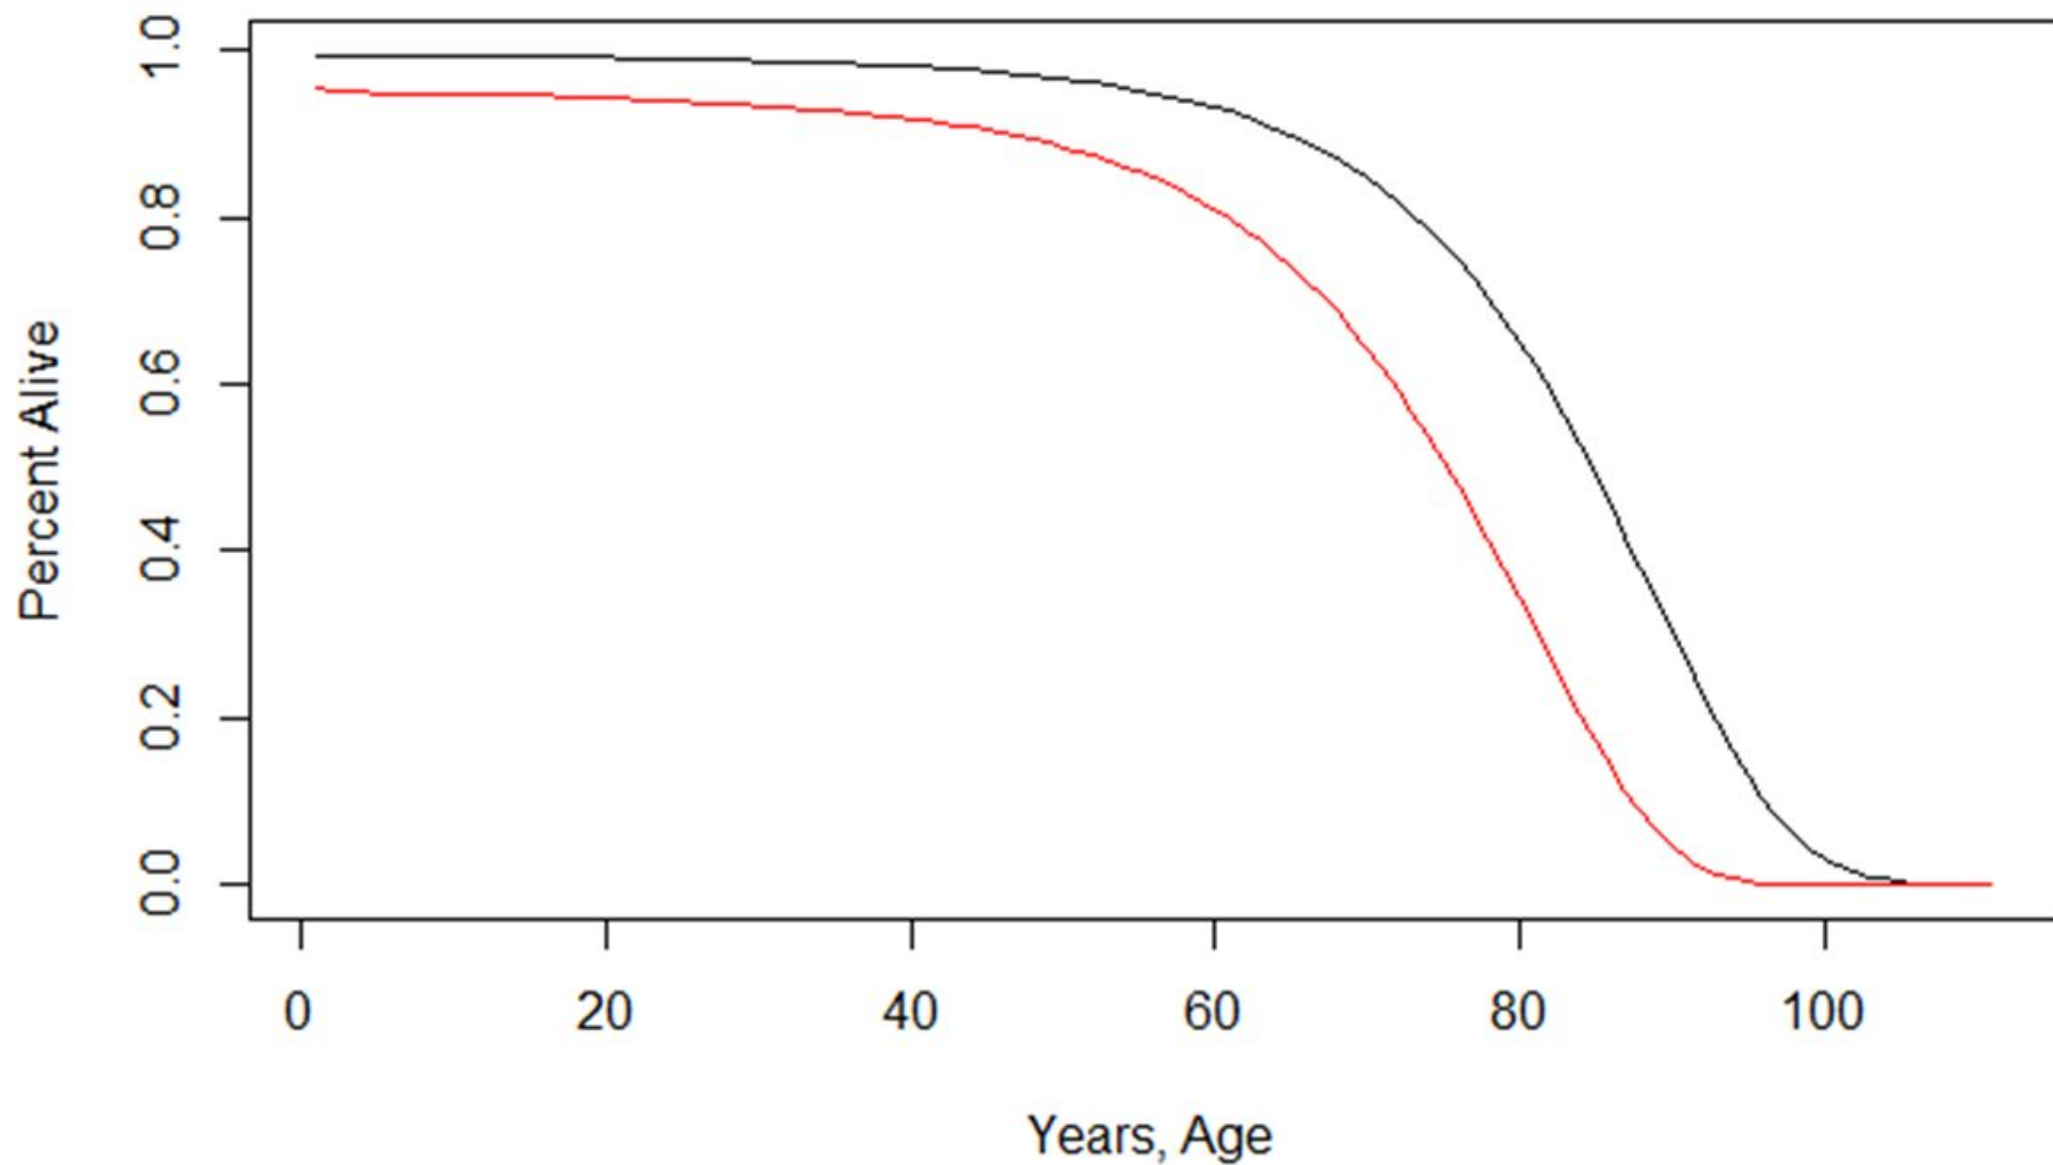

Supplement: Supplementary file [file 22113390]
